# Supplementary material for: Memory enhancement by multidomain group cognitive training in patients with Parkinson’s disease and mild cognitive impairment: long-term effects of a multicenter randomized controlled trial
Source: PubMed Central journal article supplement (PMC8563628; doi:10.1007/s00415-021-10568-9), 2021-04-27
Supplement: 415_2021_10568_MOESM1_ESM.pdf [file 415_2021_10568_MOESM1_ESM.pdf]

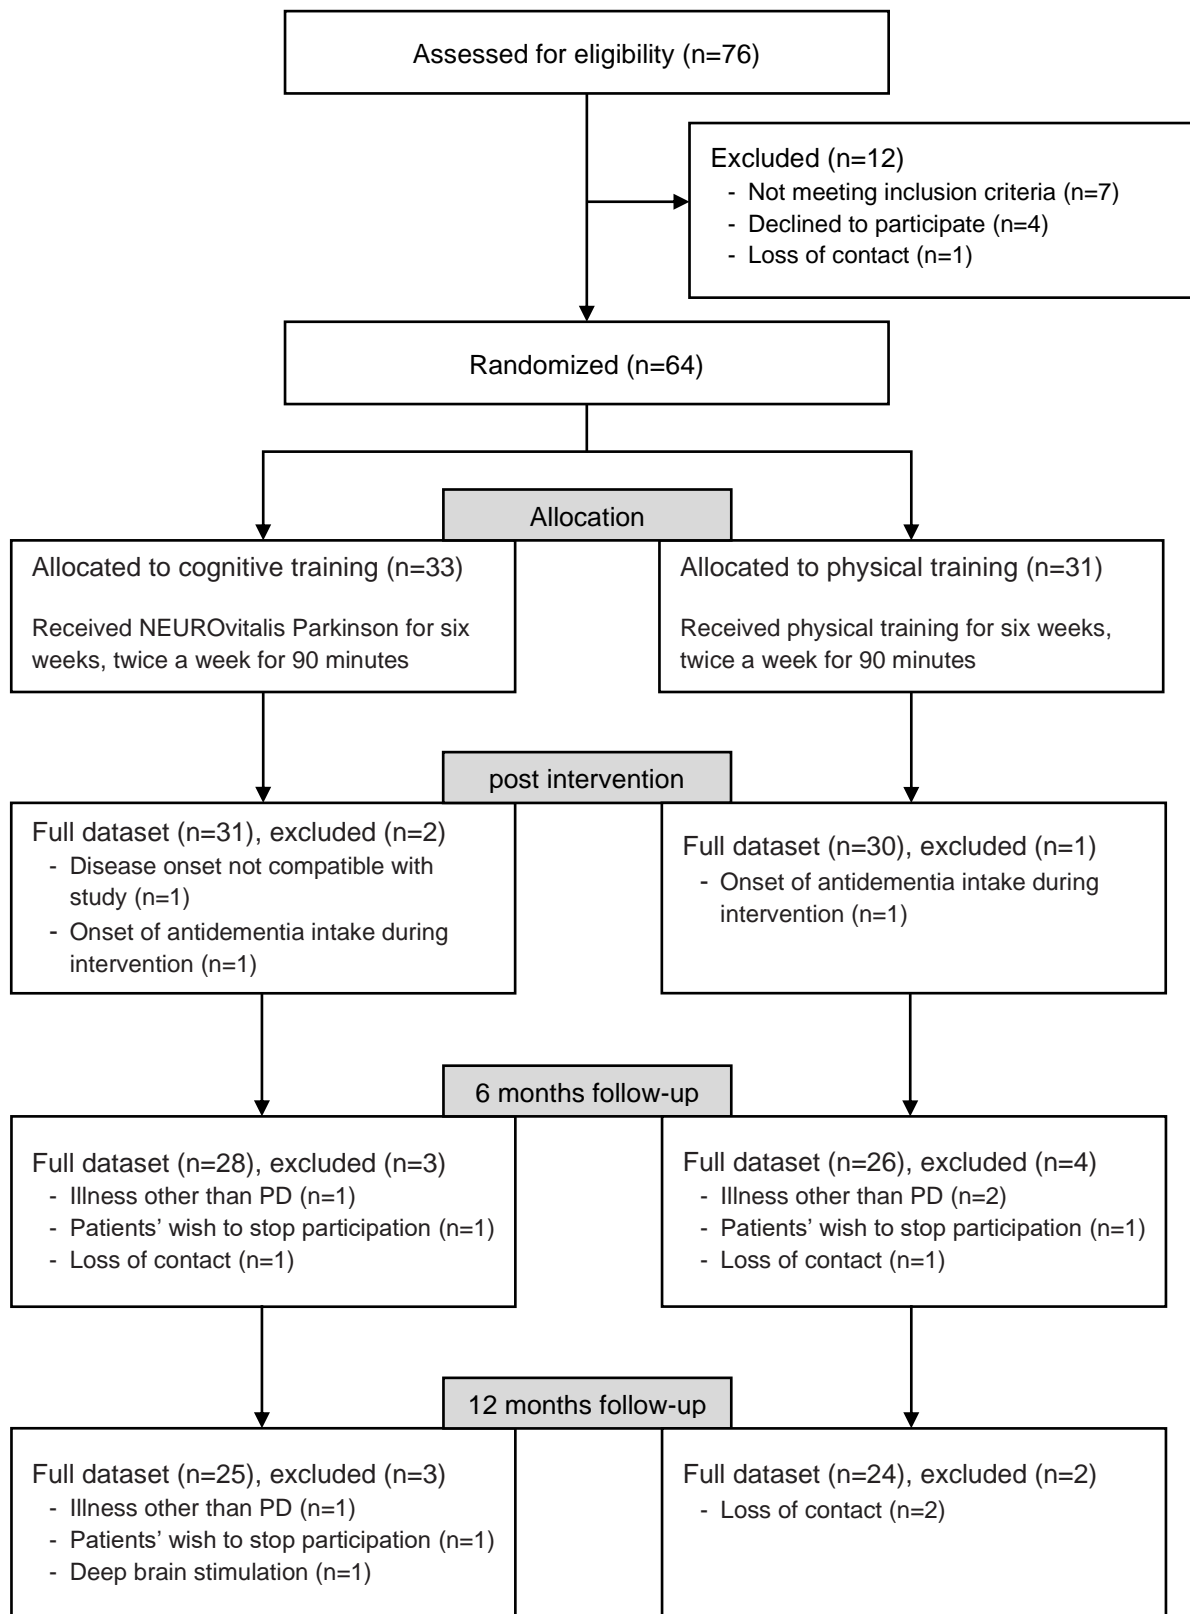

**Supplementary Figure 1.** Participant flow.
